# Supplementary material for: Development of a sensitive monoclonal antibody-based ELISA for the determination of a β-adrenergic agonist brombuterol in swine meat, liver and feed samples
Source: Royal Society of Chemistry journal article supplement (doi:10.1039/c6ay01709f), 2016-01-01
Supplement: c6ay01709f1.pdf [file c6ay01709f1.pdf]

**Supporting information:**

**Development of a sensitive monoclonal antibody-based ELISA  
for the determination of a  $\beta$ -adrenergic agonist brombuterol in  
swine meat, liver and feed samples**

Yingying Zhao<sup>a</sup>, Danni Jiang<sup>a</sup>, Kang Wu<sup>b\*</sup>, Hong Yang<sup>c</sup>, Haijing Du<sup>a</sup>, Kang  
Zhao<sup>a</sup>, Jianguo Li<sup>a\*</sup>, Anping Deng<sup>a\*</sup>

<sup>a</sup>The Key Lab of Health Chemistry & Molecular Diagnosis of Suzhou, College of  
Chemistry, Chemical Engineering & Materials Science, Soochow University,  
Renai Road 199, Suzhou 215123, China

<sup>b</sup>School of Biology & Basic Medical Science, Soochow University, Suzhou,  
215123, China

<sup>c</sup>College of Pharmacy Sciences, Soochow University, Suzhou, 215123, China

\* Corresponding author: Tel: +86 512 65884630; Fax: +86 512 65884630  
e-mail: wukang650202@163.com; lijgsd@suda.edu.cn; danganping@suda.edu.cn

**The processes of the monoclonal antibody production**

## **1. Immunization**

Seven female BALB/c mice (6-8 weeks) were immunized subcutaneously with brombuterol-BSA conjugate. The immunization procedures were as follows. Brombuterol-BSA was dissolved in physiological saline and then sufficiently mixed with equal volume of Freund's adjuvant to form an emulsion. The mice were subcutaneously immunized and each mouse was received 100 µg immunogen. Two weeks after the initial immunization, the mice were received the second immunization with the same amount of immunogen accompanied with incomplete Freund's adjuvant. The interval between the two/third and third/fourth immunization was two weeks. Ten days after the fourth immunization, the blood of each immunized mouse was separately collected from the caudal vein. The titer and affinity of the sera obtained from the mice were tested by an ic-ELISA in which brombuterol-OVA was used as a coating antigen (1 µg mL<sup>-1</sup>), the mice serum was diluted at the ratio of 1:1,000–1:100,000 and brombuterol was used as the competitor (the detailed procedures of the ic-ELISA were given in the section of “Procedures of indirect competitive ELISA”). After 14 days of the fourth immunization, two mice with the lowest IC<sub>50</sub> values (e.g. the highest affinity recognition with brombuterol) were intraperitoneally received the fifth immunization with 100 µg of the immunogen dissolved in physiological saline without adjuvant. Three days later, the spleen cells from these two mice were collected for cell fusion.

## **2. Cell fusion**

The generation of hybridomas was performed as described elsewhere (Wang et al.,

2009). The spleen cells collected from immunized mice were fused with SP2/0 cells at the initial ratio of 10:1 at 37°C in a water bath. 50% of PEG<sub>4000</sub> was used as a fusogenic agent. After the fusion process, the mixture of cells and RPMI-1640 medium were spread in 96-well cell culture plates in which hypoxanthine–aminopterin–thymidine (HAT) medium containing 15% fetal calf serum were previously added for hybridomas selection and cell nutrition. The 96-well culture plates were incubated in cell culture incubator with the atmosphere of 5% CO<sub>2</sub> and the temperature of 37°C.

### **3. Hybridoma selection and cloning**

Ten days after the incubation of cells, the supernatants from every well of the culture plates were collected and tested by an ic-ELISA. Every 96-well culture plate for cell culture and microtiter plate for ELISA was numbered to prevent confuse. The 96-well microtiter plates were coated with brombuterol-OVA (100 µL well<sup>-1</sup>, 5 µg mL<sup>-1</sup> in coating buffer) overnight at 4 °C. The plates were washed with PBST three times and then blocked with 1% casein (140 µL well<sup>-1</sup> dissolved in PBS) at room temperature for 1 h. The plates were washed again as before, then each well of the plates received 50 µL of hybridomas supernatants from each well of the corresponding numbered culture plates and then were incubated at room temperature for 1 h. After washing, HRP-GaMIgG diluted in PBS (100 µL well<sup>-1</sup>) was added to the plates and incubated for 2 h. After the plates were washed, the substrate solution (100 µL well<sup>-1</sup>) was added to the plates and shaken for 15-20 minutes. Sulfuric acid (60 µL well<sup>-1</sup>) was added to the plate to stop the enzymatic reaction. The absorbance of each well of the plates was read with ELISA reader at 450 nm. The hybridomas capable of secreting mAb to the

culture supernatants which were tested by ic-ELISA with the high absorbance value (top 5%) were expanded. The culture supernatants from the expanded hybridomas were tested by ic-ELISA again. Only those which secreted antibodies specific to brombuterol were selected and subcloned further. After subcloning 2 times by the stepwise dilution, the cell clones which were able to secrete the antibody against brombuterol stably were finally expanded, frozen overnight at  $-80\text{ }^{\circ}\text{C}$  and stored in liquid nitrogen.

Five BALB/c male mice were used for antibody production. Each mouse was intraperitoneally injected with 0.5 mL of pristane. A week later, each mouse was intraperitoneally injected with  $8 \times 10^5$  hybridoma cells. After 10 days, the ascites from the mice were collected, mixed with equal volume of glycerol (containing 0.02% of  $\text{NaN}_3$ ) and stored at  $-20\text{ }^{\circ}\text{C}$  until use.

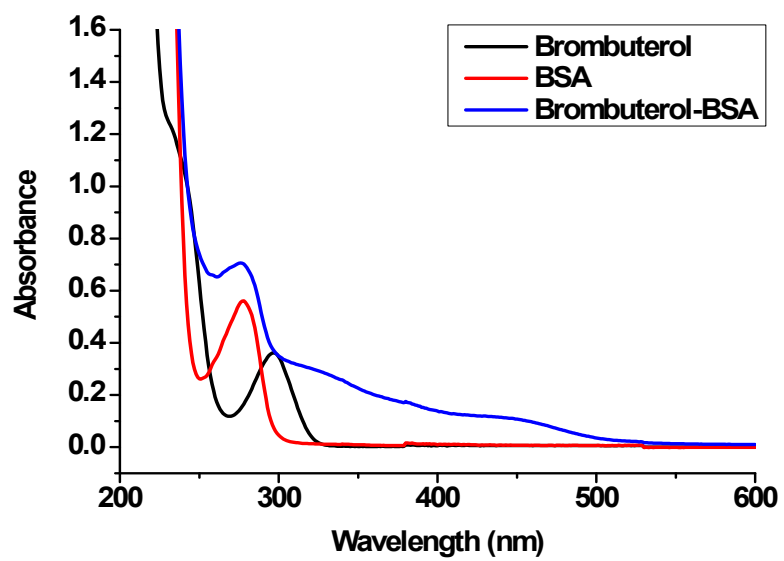

Fig. S1. UV-visible spectra of BSA, brombuterol and the brombuterol–BSA conjugate
